# Supplementary figures and images for: Optimal Surgical Extent in Patients with Unilateral Multifocal Papillary Thyroid Carcinoma
Source: MDPI journal article supplement (doi:10.3390/cancers14020432), 2022-01-15

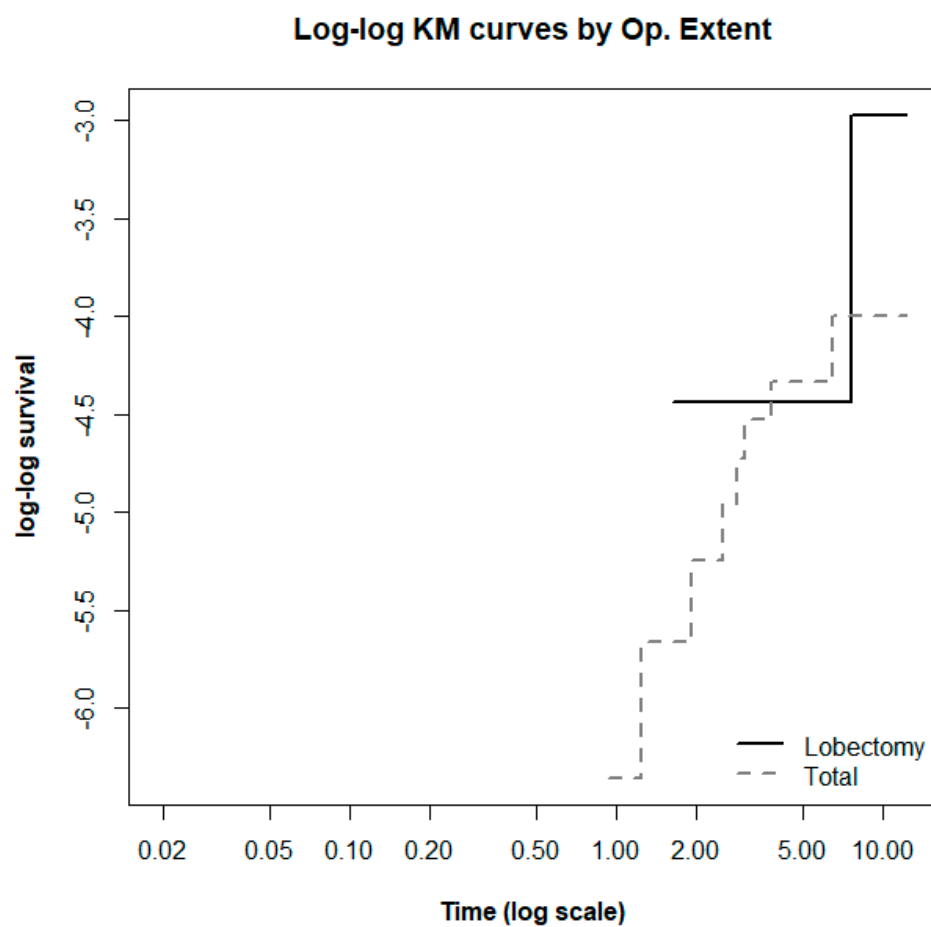

**Figure S1.** Comparison of survival analysis by the operative extent:  $\log(-\log(\text{survival}))$  plot.

Supplement: s1 [file s1]
